# Supplementary material
Source: PubMed Central journal article supplement (PMC2859041)

# Supplemental Figure S1

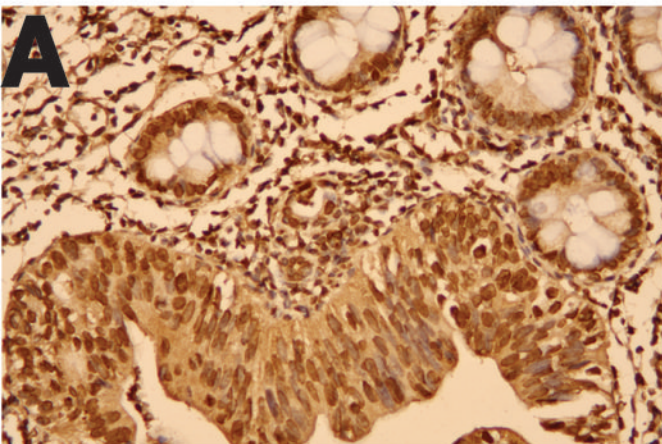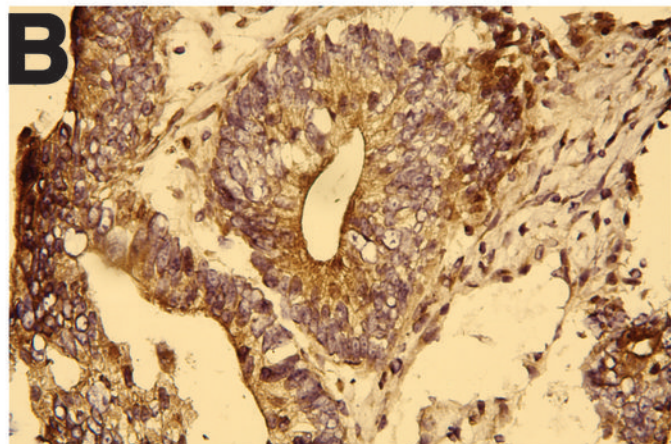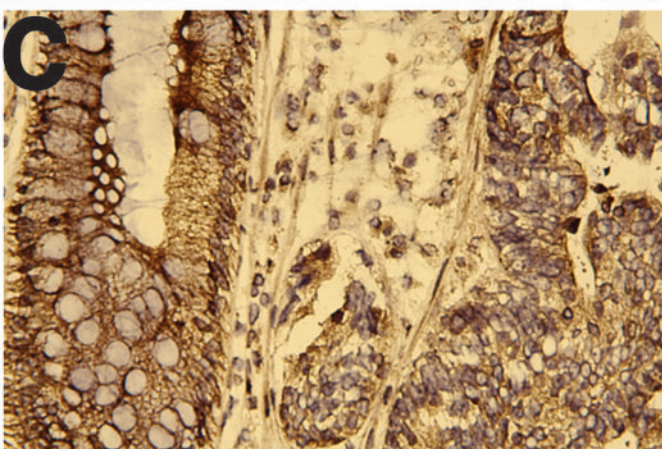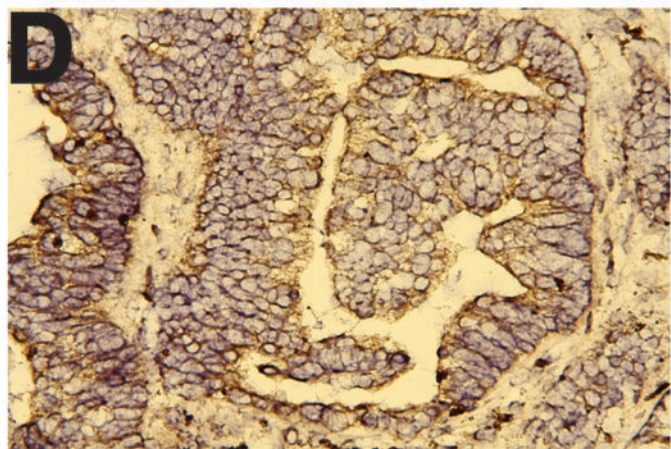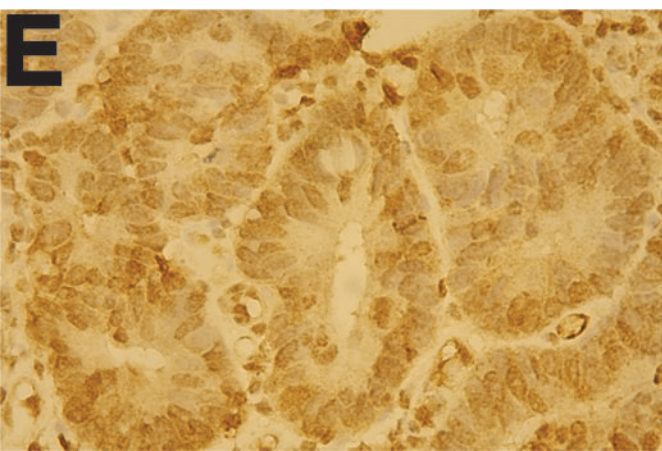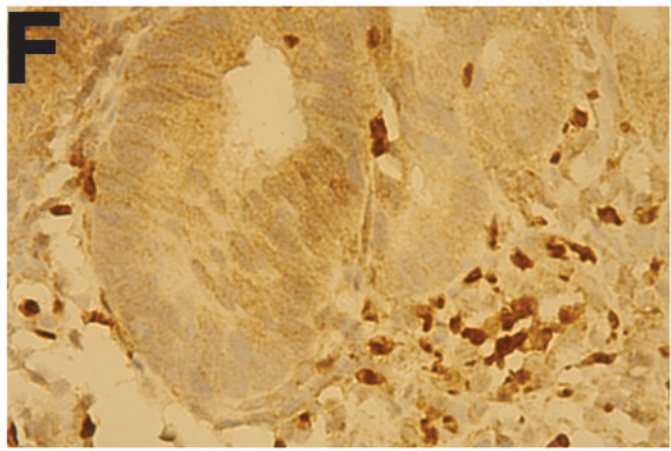

Supplement: NIHMS192280-supplement-Fig__S1.pdf [file NIHMS192280-supplement-Fig__S1.pdf]

# Supplemental Figure S2

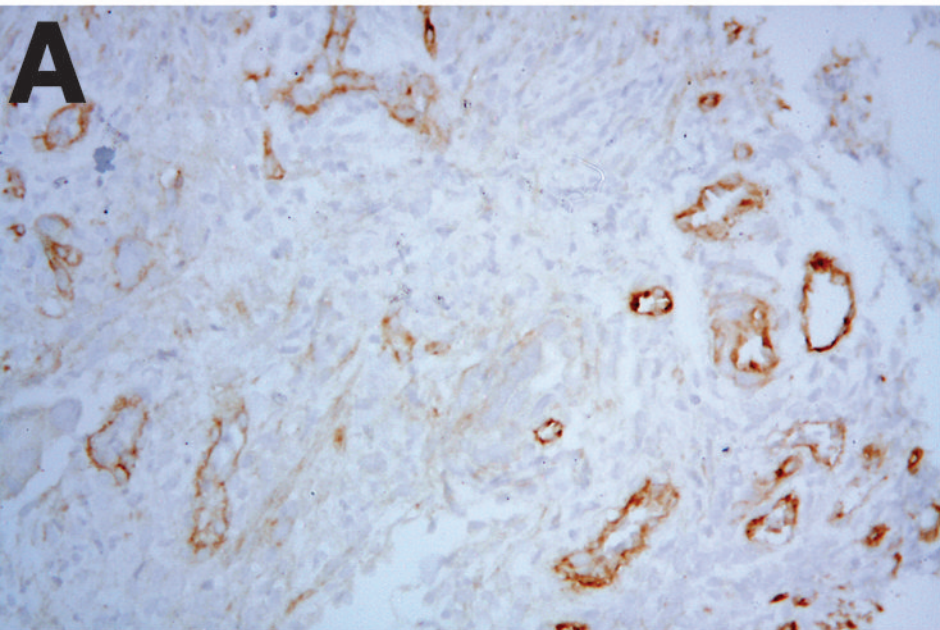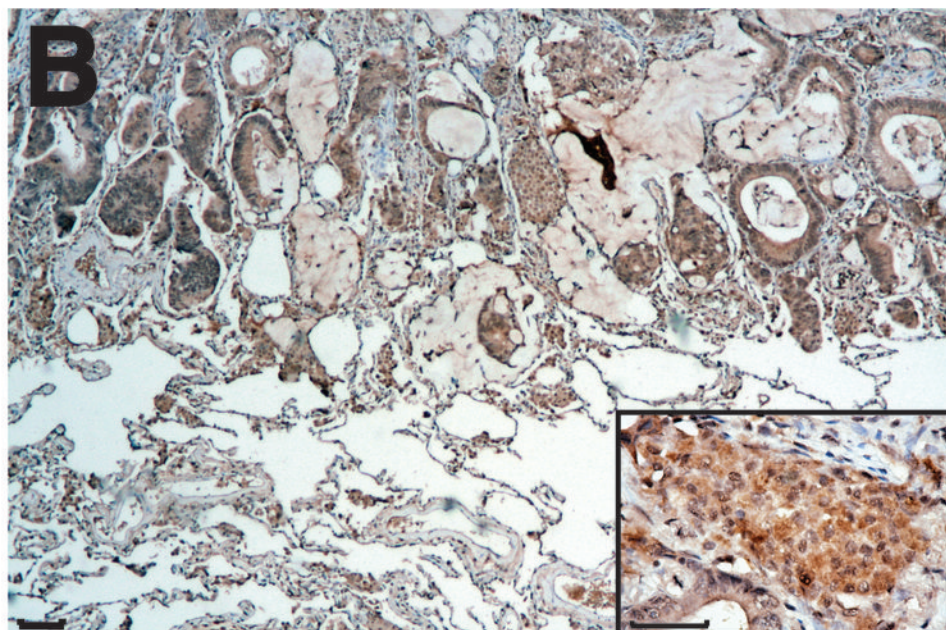

Supplement: NIHMS192280-supplement-Fig__S2.pdf [file NIHMS192280-supplement-Fig__S2.pdf]
